# Supplementary material for: Machine learning methods for the detection of explosives, drugs and precursor chemicals gathered using a colorimetric sniffer sensor
Source: Royal Society of Chemistry journal article supplement (doi:10.1039/d3ay00247k), 2023-01-01
Supplement: d3ay00247k1.pdf [file d3ay00247k1.pdf]

## Supplementary materials

### Materials

The HMEs used in this study, TATP, HMTD and MEKP, were either provided by Danish Emergency Management Agency (DEMA) or synthesized at the Technical University of Denmark (DTU) laboratories (TATP only). Two different batches of TATP and HMTD (solid HMEs) were provided by DEMA; each of the samples was synthesized in their laboratories using two different types of catalysis and following two different protocols based on their experience gained by investigations of clandestine labs and reflecting a real scenario. A batch of liquid sample MEKP was synthesized by DEMA using a protocol provided by CIA. Furthermore, we measured over two years to see the effect of ageing of the HMEs. Several batches of TATP were synthesized at DTU which were regularly destroyed after use, following safety protocols. All samples were chemically characterized by proton NMR spectroscopy.

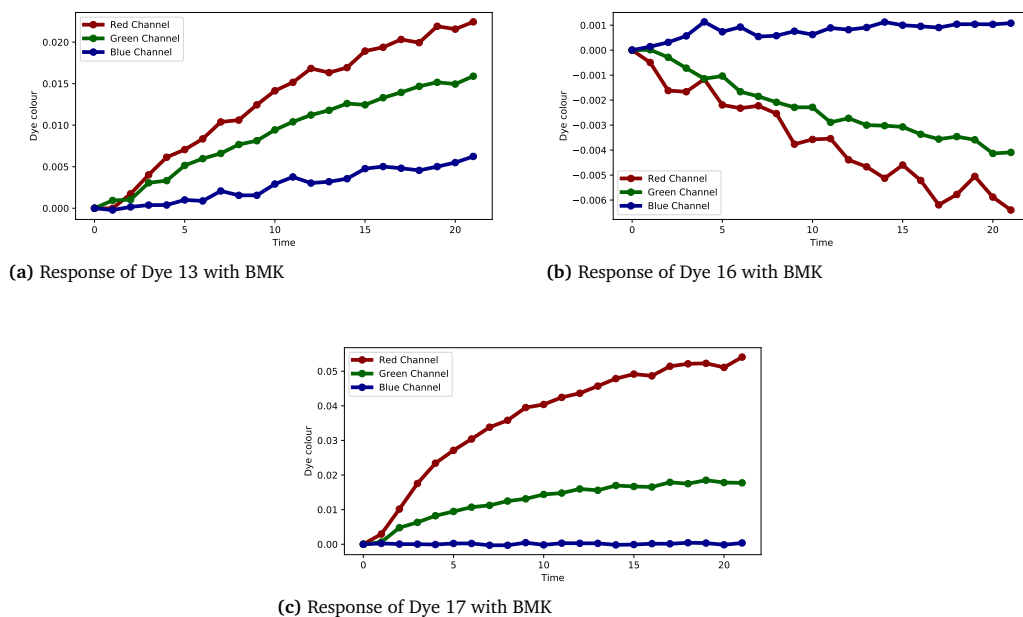

Fig. S1. Plot of time series obtained from the chip for BMK for selected dyes. The RGB channel responses of the dyes are shown as red, green, and blue lines respectively.

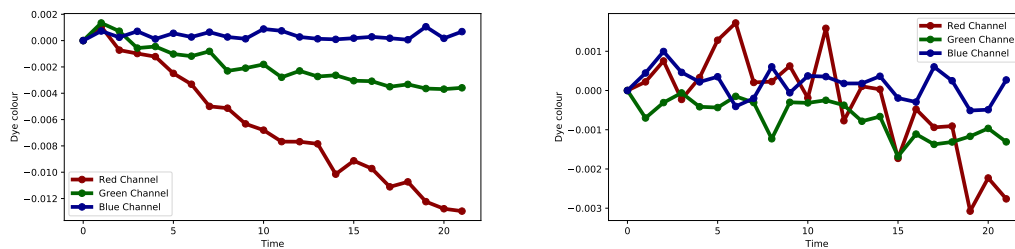

Fig. S2. An example of a normal (top) and outlier (bottom) measurement session for TATP with responses on the red channel, green channel, and blue channel.

### Notes and references

1 *1,2-Ethandiol*, <https://webbook.nist.gov/cgi/cbook.cgi?ID=107-21-1>, Accessed: 23-06-2022.

\*\* Controlled chemicals, authorising licence for use needed.

†† 10-15% Aqueous solution.

§§ Nitrogen, oxygen, water vapor, argon, and carbon dioxide account for about 99% of the composition of air.

| Analyte                                                      |                               |                                                                                     |                        | Use                                              | Vapor pressure at 25°C (Pa) |
|--------------------------------------------------------------|-------------------------------|-------------------------------------------------------------------------------------|------------------------|--------------------------------------------------|-----------------------------|
| Name and CAS No                                              | Acronym                       | Chemical structure                                                                  | Physical state at 25°C |                                                  |                             |
| Ethylene glycol<br>107-21-1                                  | EG                            | 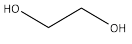   | Liquid                 | Precursor of explosive ethylene glycol dinitrate | ~ 10 <sup>1</sup>           |
| Benzyl methyl ketone also known as phenylacetone<br>103-79-7 | BMK **                        |    | Liquid                 | Precursor of methamphetamine                     | 21.3 <sup>2</sup>           |
| (1R,2S)-(-)-Ephedrine<br>299-42-3                            | EPH **                        |    | Solid                  | Precursor of methamphetamine                     | 0.16 <sup>3</sup>           |
| Hydrogen peroxide                                            | H <sub>2</sub> O <sub>2</sub> |    | Liquid <sup>††</sup>   | Precursor of TATP, 10-15% concentration          | ~16 <sup>4</sup>            |
| Hexamethylene-tetramine also known as hexamine<br>100-97-0   | HEX                           |  | Solid                  | Precursor of HMTD                                | ~0.1 <sup>5</sup>           |
| Triacetone triperoxide                                       | TATP                          |  | Solid                  | Homemade explosive                               | 6.2 <sup>6</sup>            |
| Hexamethylene triperoxide diamine                            | HMTD                          |  | Solid                  | Homemade explosive                               | ~6.5e-6 Pa <sup>7</sup>     |
| Methyl ethyl ketone peroxide                                 | MEKP                          |  | Liquid                 | Homemade explosive                               | 1.3 <sup>8</sup>            |
| Cocaine free base<br>50-36-2                                 | COfb **                       |  | Solid                  | Controlled drug                                  | 0.0003 <sup>9</sup>         |

2 Phenylacetone, <https://pubchem.ncbi.nlm.nih.gov/compound/Phenylacetone>, Accessed: 24-06-2022.

3 Ephedrine, <https://pubchem.ncbi.nlm.nih.gov/compound/Ephedrine>, Accessed: 24-06-2022.

4 H<sub>2</sub>O<sub>2</sub>, <http://www.h2o2.com/technical-library/physical-chemical-properties/physical-properties/default.aspx?pid=25&name=Vapor-Pressures>, Accessed: 20-06-2022.

5 I. Stranski, G. Klipping, A. Bogenschuetz, H. Heinrich and H. Maennig, in *Advances in Catalysis*, Elsevier, 1957, vol. 9, pp. 406–414.

6 H. Östmark, S. Wallin and H. G. Ang, *Propellants, Explosives, Pyrotechnics*, 2012, **37**, 12–23.

7 M. J. Aernecke, T. Mendum, G. Geurtsen, A. Ostrinskaya and R. R. Kunz, *The Journal of Physical Chemistry A*, 2015, **119**, 11514–



|                             |     |                                                                                     |        |                                                                     |                                           |
|-----------------------------|-----|-------------------------------------------------------------------------------------|--------|---------------------------------------------------------------------|-------------------------------------------|
| Acetone 67-64-1             | Ac  | 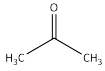   | Liquid | Precursor of homemade explosive, Manufacturing solvent              | 30800 <sup>10</sup>                       |
| Safrole 94-59-7             | SA  |    | Liquid | Precursor of methamphetamine                                        | 9.3 <sup>11</sup>                         |
| Methyl ethyl ketone 78-93-3 | MEK |    | Liquid | Precursor of MEKP                                                   | 12100 <sup>12</sup>                       |
| Mannitol 69-65-8            | MA  |    | Solid  | Precursor of homemade explosive                                     | Data unavailable (Very low) <sup>13</sup> |
| meso-Erythritol 149-32-6    | ER  |    | Solid  | Precursor of homemade explosive                                     | Data unavailable (Very low) <sup>14</sup> |
| Pentaerythritol 115-77-5    | PER |  | Solid  | Precursor of homemade explosive                                     | 1.07e-7 <sup>15</sup>                     |
| Cyclohexanone 108-94-1      | Cy  |  | Liquid | Manufacturing solvent                                               | 667 <sup>16</sup>                         |
| Dibutyl phthalate 84-74-2   | DP  |  | Liquid | Additive in explosive formulations                                  | 1.9e-3 <sup>17</sup>                      |
| Phenol 108-95-2             | Ph  |  | Solid  | Toxic. Important chemical intermediate in many industrial processes | 53 <sup>18</sup>                          |

11522.

8 *MEKP*, <https://pubchem.ncbi.nlm.nih.gov/compound/2-Butanone-peroxide#section=Vapor-Density>, Accessed: 24-06-2022.

9 A. B. Dindal, M. V. Buchanan, R. A. Jenkins and C. K. Bayne, *Analyst*, 2000, **125**, 1393–1396.

10 *Acetone*, <https://pubchem.ncbi.nlm.nih.gov/compound/acetone#section=Vapor-Pressure>, Accessed: 1-7-2022.

11 *Safrole*, <https://pubchem.ncbi.nlm.nih.gov/compound/safrole#section=Vapor-Pressure>, Accessed: 1-7-2022.

12 *MEK*, <https://pubchem.ncbi.nlm.nih.gov/compound/Methyl-ethyl-ketone#section=Vapor-Pressure>, Accessed: 1-7-2022.

|                                          |                  |  |        |                                                                           |                      |
|------------------------------------------|------------------|--|--------|---------------------------------------------------------------------------|----------------------|
| Ammonium nitrate 6484-52-2               | AN               |  | Solid  | Oxidizer for homemade explosive formulations                              | 0.32 <sup>19</sup>   |
| 2,3-Dimethyl-2,3-dinitrobutane 3964-18-9 | DMNB             |  | Solid  | Additive (taggant) in explosive formulations                              | 0.27 <sup>20</sup>   |
| Toluene 108-88-3                         | Tol              |  | Liquid | Solvent                                                                   | 3800 <sup>21</sup>   |
| Urea 57-13-6                             | Ur               |  | Solid  | Precursor of explosives                                                   | 1.6e-3 <sup>22</sup> |
| Glycerin 56-81-5                         | Gly              |  | Liquid | Precursor of home-made explosives                                         | 321e3 <sup>23</sup>  |
| Ambient air                              | AA <sup>§§</sup> |  | Gas    | Chemical                                                                  |                      |
| Water                                    | H <sub>2</sub> O |  | Liquid | Control analyte and precursor of home-made explosives in aqueous solution |                      |

Table S1. Analytes used for the colorimetric detection experiments with Crim-Track sniffer device. Typical quantities of 25 – 50 mg of solid analytes and 0.1 ml of liquid analytes or solution of analytes were used for the detection experiments

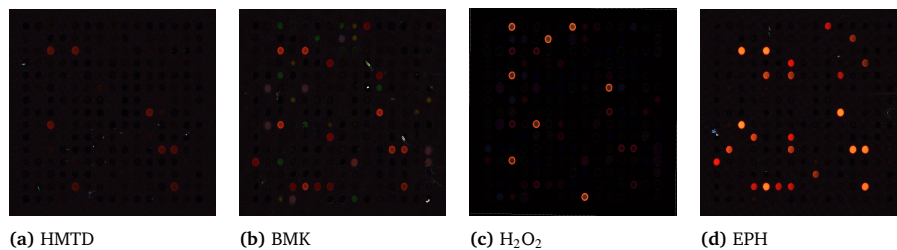

Fig. S3. Difference maps of the experiments with HMTD, BMK, H<sub>2</sub>O<sub>2</sub> and EPH considered in this work.

13 *Mannitol*, <https://cameochemicals.noaa.gov/chemical/20585>, Accessed: 1-7-2022.

14 M. Bilde, K. Barsanti, M. Booth, C. D. Cappa, N. M. Donahue, E. U. Emanuelsson, G. McFiggans, U. K. Krieger, C. Marcolli, D. Topping *et al.*, *Chemical reviews*, 2015, **115**, 4115–4156.

15 *Pentaerythritol*, <https://pubchem.ncbi.nlm.nih.gov/compound/pentaerythritol#section=Vapor-Pressure>, Accessed: 1-7-

| Analyte/Dataset               | Ex1 | Ex2 | Pc1 | Pc2 | Pc3 | Pc4 | Pc5 | D1 | D2 |
|-------------------------------|-----|-----|-----|-----|-----|-----|-----|----|----|
| TATP                          | 63  | 9   |     |     |     |     |     |    |    |
| HMTD                          | 68  |     |     |     |     |     |     |    |    |
| MEKP                          | 33  |     |     |     |     |     |     |    |    |
| BMK                           |     |     | 10  |     |     |     |     |    |    |
| H <sub>2</sub> O <sub>2</sub> | 33  | 8   | 10  | 23  | 20  | 15  | 13  | 16 |    |
| HEX                           |     | 9   |     |     |     |     |     |    |    |
| EG                            | 32  |     | 10  | 14  | 18  | 10  | 12  | 17 |    |
| Ac                            |     |     | 9   |     |     |     |     |    |    |
| H <sub>2</sub> O              |     | 9   |     |     |     |     |     |    |    |
| Ur                            |     |     |     |     | 20  |     |     |    |    |
| Ph                            |     |     |     | 8   |     |     |     |    |    |
| MA                            |     |     |     |     |     | 5   |     |    |    |
| ER                            |     |     |     |     |     | 6   |     |    |    |
| PER                           |     |     |     |     |     | 14  |     |    |    |
| AN                            |     |     |     |     |     |     | 13  |    |    |
| Cy                            |     |     |     |     |     |     | 12  |    |    |
| EPH                           |     |     |     |     |     |     |     | 17 |    |
| COfb                          |     |     |     |     |     |     |     | 18 | 24 |
| DMNB                          |     |     |     | 21  |     |     |     |    |    |
| DP                            |     |     |     |     |     |     | 14  |    |    |
| SA                            |     |     |     |     |     |     |     | 18 | 23 |
| MEK                           |     |     |     | 19  |     |     |     |    |    |
| Gly                           |     |     |     |     | 18  |     |     |    |    |
| Tol                           |     |     |     |     | 17  |     |     |    |    |
| AA                            | 30  | 8   | 8   | 22  | 20  | 10  | 12  | 17 | 24 |

Table S2. The number of measurements of each analyte in each dataset.

| Phase  | Analyte name                  | TPR         | FNR        | FPR        | TNR         | F1 SCORE    |
|--------|-------------------------------|-------------|------------|------------|-------------|-------------|
| Solid  | HEX                           | 100.00±0.00 | 0.00±0.00  | 0.00±0.00  | 100.00±0.00 | 100.00±0.00 |
|        | TATP                          | 90.00±0.20  | 10.00±0.20 | 47.00±0.12 | 53.00±0.12  | 63.00±0.11  |
| Liquid | H <sub>2</sub> O <sub>2</sub> | 100.00±0.00 | 0.00±0.00  | 0.00±0.00  | 100.00±0.00 | 100.00±0.00 |
|        | H <sub>2</sub> O              | 80.00±0.24  | 20.00±0.24 | 5.00±0.10  | 95.00±0.10  | 80.00±0.16  |

Table S3. Classification results for Ex2 dataset obtained by using the classifier. The best classifier's results for solids (KNN) and liquid (RF) analytes are shown separately.

| Phase  | Analyte name                  | TPR         | FNR        | FPR       | TNR         | F1 SCORE    |
|--------|-------------------------------|-------------|------------|-----------|-------------|-------------|
| Liquid | Ac                            | 70.00±0.40  | 30.00±0.40 | 8.00±0.10 | 92.00±0.10  | -           |
|        | BMK                           | 100.00±0.00 | 0.00±0.00  | 0.00±0.00 | 100.00±0.00 | 100.00±0.00 |
|        | EG                            | 90.00±0.20  | 10.00±0.20 | 3.00±0.06 | 97.00±0.06  | 90.00±0.20  |
|        | H <sub>2</sub> O <sub>2</sub> | 100.00±0.00 | 0.00±0.00  | 0.00±0.00 | 100.00±0.00 | 100.00±0.00 |

Table S4. Classification results for Pc1 dataset obtained by using the RF classifier. This dataset only has liquid analytes.

- 2022.
- 16 Cyclohexanone, "<https://webwisser.nlm.nih.gov/WebWISER/substance?substanceId=513&identifier=Cyclohexanone&identifierType=name&catId=48>", Accessed: 1-7-2022.
- 17 Dibutyl phthalate, "<https://pubchem.ncbi.nlm.nih.gov/compound/Dibutyl-phthalate#section=InChI>", Accessed: 1-7-2022.
- 18 Phenol, <https://pubchem.ncbi.nlm.nih.gov/compound/phenol#section=Vapor-Pressure>, Accessed: 1-7-2022.
- 19 J. Brandner, N. M. Junk, J. Lawrence and J. Robins, *Journal of Chemical and Engineering Data*, 1962, 7, 227–228.
- 20 K. R. M. F. Vojtěch Štejfá, Kateřina Kadlecová, *Chemical Thermodynamics and Thermal Analysis*, 2021, 3, 100020.
- 21 Toluene, <https://pubchem.ncbi.nlm.nih.gov/compound/toluene#section=Vapor-Pressure>, Accessed: 6-7-2022.
- 22 Urea, <https://pubchem.ncbi.nlm.nih.gov/compound/urea#section=Vapor-Pressure>, Accessed: 6-7-2022.

| Phase  | Analyte name                  | TPR         | FNR        | FPR        | TNR         | F1 SCORE    |
|--------|-------------------------------|-------------|------------|------------|-------------|-------------|
| Solid  | DMNB                          | 53.00±0.20  | 47.00±0.20 | 37.00±0.26 | 63.00±0.26  | 54.00±0.16  |
| Liquid | EG                            | 100.00±0.00 | 0.00±0.00  | 0.00±0.00  | 100.00±0.00 | 100.00±0.00 |
|        | H <sub>2</sub> O <sub>2</sub> | 90.00±0.20  | 10.00±0.20 | 0.00±0.00  | 100.00±0.00 | 93.00±0.13  |
|        | MEK                           | 100.00±0.00 | 0.00±0.00  | 0.00±0.00  | 100.00±0.00 | 100.00±0.00 |
|        | Ph                            | 100.00±0.00 | 0.00±0.00  | 0.00±0.00  | 100.00±0.00 | 100.00±0.00 |

Table S5. Classification results for Pc2 dataset obtained by using the classifier. The best classifier's results for solids (KNN) and liquid (RF) analytes are shown separately.

| Phase  | Analyte name                  | TPR        | FNR        | FPR        | TNR         | F1 SCORE   |
|--------|-------------------------------|------------|------------|------------|-------------|------------|
| Solid  | Ur                            | 75.00±0.27 | 25.00±0.27 | 50.00±0.35 | 50.00±0.35  | 65.00±0.17 |
| Liquid | EG                            | 90.00±0.12 | 10.00±0.12 | 0.00±0.00  | 100.00±0.00 | 94.00±0.07 |
|        | Gly                           | 40.00±0.16 | 60.00±0.16 | 12.00±0.05 | 88.00±0.05  | 42.00±0.15 |
|        | H <sub>2</sub> O <sub>2</sub> | 95.00±0.10 | 5.00±0.10  | 0.00±0.00  | 100.00±0.00 | 97.00±0.06 |
|        | Tol                           | 82.00±0.15 | 18.00±0.15 | 13.00±0.07 | 87.00±0.07  | 68.00±0.17 |

Table S6. Classification results for Pc3 dataset obtained by using the classifier. The best classifier's results for solids (SVM) and liquid (KNN) analytes are shown separately.

| Phase  | Analyte name                  | TPR         | FNR         | FPR         | TNR         | F1 SCORE    |
|--------|-------------------------------|-------------|-------------|-------------|-------------|-------------|
| Solid  | ER                            | 0.00±0.00   | 100.00±0.00 | 0.00±0.00   | 100.00±0.00 | -           |
|        | MA                            | 0.00±0.00   | 100.00±0.00 | 0.00±0.00   | 100.00±0.00 | -           |
|        | PER                           | 100.00±0.00 | 0.00±0.00   | 100.00±0.00 | 0.00±0.00   | 56.90±0.06  |
| Liquid | EG                            | 90.00±0.20  | 10.00±0.20  | 0.00±0.00   | 100.00±0.00 | 93.00±0.13  |
|        | H <sub>2</sub> O <sub>2</sub> | 100.00±0.00 | 0.00±0.00   | 0.00±0.00   | 100.00±0.00 | 100.00±0.00 |

Table S7. Classification results for Pc4 dataset obtained by using the KNN classifier. The best classifier's results for solids (SVM) and liquid (KNN) analytes are shown separately.

| Phase  | Analyte name                  | TPR         | FNR       | FPR        | TNR         | F1 SCORE    |
|--------|-------------------------------|-------------|-----------|------------|-------------|-------------|
| Solid  | AN                            | 93.00±0.13  | 7.00±0.13 | 56.90±0.39 | 43.00±0.39  | 76.00±0.10  |
| Liquid | EG                            | 100.00±0.00 | 0.00±0.00 | 0.00±0.00  | 100.00±0.00 | 100.00±0.00 |
|        | H <sub>2</sub> O <sub>2</sub> | 100.00±0.00 | 0.00±0.00 | 0.00±0.00  | 100.00±0.00 | 100.00±0.00 |

Table S8. Classification results for Pc5 dataset obtained by using the classifier. The best classifier's results for solids (RF) and liquid (KNN) analytes are shown separately.

| Phase  | Analyte name | TPR        | FNR        | FPR        | TNR        | F1 SCORE   |
|--------|--------------|------------|------------|------------|------------|------------|
| Solid  | COfb         | 72.00±0.18 | 28.00±0.00 | 35.00±0.06 | 65.00±0.06 | 68.00±0.09 |
| Liquid | SA           | 86.00±0.20 | 14.00±0.20 | 40.00±0.22 | 60.00±0.22 | 74.00±0.13 |

Table S9. Classification results for D2 dataset obtained by using the RF classifier. The best classifier's results for solids (SVM) and liquid (KNN) analytes are shown separately.

|      | TATP | AA | HMTD |
|------|------|----|------|
| TATP | 55   | 13 | 23   |
| AA   | 0    | 0  | 0    |
| HMTD | 21   | 23 | 59   |

Table S10. Confusion matrix of solid analyte classification of Ex1 dataset with the GPLASSO classifier.

|      | TATP | HEX | AA |
|------|------|-----|----|
| TATP | 10   | 0   | 10 |
| HEX  | 0    | 11  | 0  |
| AA   | 1    | 0   | 0  |

Table S11. Confusion matrix of solid analyte classification of Ex2 dataset with KNN classifier.

|                               | BMK | EG | H <sub>2</sub> O <sub>2</sub> | Ac | AA |
|-------------------------------|-----|----|-------------------------------|----|----|
| BMK                           | 12  | 0  | 0                             | 0  | 0  |
| EG                            | 0   | 11 | 0                             | 1  | 0  |
| H <sub>2</sub> O <sub>2</sub> | 0   | 0  | 12                            | 0  | 0  |
| Ac                            | 0   | 1  | 0                             | 9  | 3  |
| AA                            | 0   | 0  | 0                             | 1  | 7  |

Table S12. Confusion matrix of liquid analytes classification of Pc1 dataset with RF classifier.

|                               | Gly | H <sub>2</sub> O <sub>2</sub> | To | EG | AA |
|-------------------------------|-----|-------------------------------|----|----|----|
| Gly                           | 9   | 0                             | 2  | 2  | 7  |
| H <sub>2</sub> O <sub>2</sub> | 0   | 23                            | 0  | 0  | 0  |
| Tol                           | 4   | 0                             | 16 | 0  | 9  |
| EG                            | 0   | 0                             | 0  | 20 | 0  |
| AA                            | 9   | 1                             | 2  | 0  | 8  |

Table S13. Confusion matrix of liquid analytes classification of Pc3 dataset for KNN classifier.

|     | MA | ER | PER | AA |
|-----|----|----|-----|----|
| MA  | 0  | 0  | 0   | 0  |
| ER  | 0  | 0  | 0   | 0  |
| PER | 6  | 8  | 16  | 12 |
| AA  | 0  | 0  | 0   | 0  |

Table S14. Confusion matrix of solid analytes classification of Pc4 dataset with SVM classifier.

|      | AA | COfb |
|------|----|------|
| AA   | 14 | 10   |
| COfb | 10 | 14   |

Table S15. Confusion matrix of solid analytes classification of D2 dataset with SVM classifier.

|    | AA | E   |
|----|----|-----|
| AA | 4  | 14  |
| E  | 32 | 144 |

|    | AA | E  | EP |
|----|----|----|----|
| AA | 23 | 6  | 8  |
| E  | 11 | 34 | 3  |
| EP | 2  | 0  | 67 |

Table S16. Confusion matrix for the Ex1 dataset in a condensed form. Left: Solid analytes, Right: Liquid analytes.

23 *Glycerin*, <https://pubchem.ncbi.nlm.nih.gov/compound/glycerol#section=Vapor-Density>, Accessed: 6-7-2022.

|    | AA | E  | EP |
|----|----|----|----|
| AA | 0  | 1  | 0  |
| E  | 10 | 10 | 0  |
| EP | 0  | 0  | 11 |

|    | AA | EP |
|----|----|----|
| AA | 7  | 0  |
| EP | 0  | 9  |

Table S17. Confusion matrix for the Ex2 dataset in a condensed form. Left: Solid analytes, Right: Liquid analytes.

|    | AA | D  | DP | E   | EA | EP |
|----|----|----|----|-----|----|----|
| AA | 63 | 30 | 0  | 24  | 16 | 59 |
| D  | 5  | 9  | 0  | 0   | 0  | 1  |
| DP | 0  | 0  | 18 | 0   | 0  | 1  |
| E  | 15 | 12 | 2  | 160 | 4  | 16 |
| EA | 8  | 0  | 0  | 0   | 6  | 0  |
| EP | 1  | 0  | 0  | 0   | 0  | 6  |

|    | AA | DP | E  | EP  |
|----|----|----|----|-----|
| AA | 78 | 35 | 4  | 39  |
| DP | 7  | 24 | 1  | 1   |
| E  | 0  | 0  | 33 | 1   |
| EP | 6  | 2  | 0  | 199 |

Table S18. Confusion matrix for the combined diff dataset in a condensed form. Left: Solid analytes, Right: Liquid analytes.

|    | AA | D  | DP | E   | EA | EP |
|----|----|----|----|-----|----|----|
| AA | 60 | 28 | 0  | 26  | 5  | 49 |
| D  | 3  | 15 | 0  | 4   | 0  | 2  |
| DP | 0  | 0  | 18 | 0   | 0  | 0  |
| E  | 22 | 7  | 0  | 152 | 0  | 23 |
| EA | 6  | 0  | 0  | 1   | 19 | 0  |
| EP | 1  | 1  | 2  | 1   | 2  | 9  |

|    | AA | DP | E  | EP  |
|----|----|----|----|-----|
| AA | 73 | 33 | 4  | 25  |
| DP | 6  | 20 | 4  | 6   |
| E  | 4  | 4  | 23 | 7   |
| EP | 6  | 2  | 0  | 202 |

Table S19. Confusion matrix for the combined time series dataset in a condensed form. Left: Solid analytes, Right: Liquid analytes.

| Phase  | Analyte name                  | TPR         | FNR         | FPR         | TNR         | F1 SCORE    |
|--------|-------------------------------|-------------|-------------|-------------|-------------|-------------|
| Solid  | AN                            | 0.00±0.00   | 100.00±0.00 | 0.26±0.52   | 99.74±0.52  | -           |
|        | COfb                          | 22.50±20.00 | 77.50±20.00 | 1.41±2.18   | 98.59±2.18  | -           |
|        | MA                            | 0.00±0.00   | 100.00±0.00 | 0.00±0.00   | 100.00±0.00 | -           |
|        | DMNB                          | 24.00±15.94 | 76.00±15.94 | 2.13±4.27   | 97.87±4.27  | -           |
|        | EPH                           | 90.00±20.00 | 10.00±20.00 | 0.26±0.52   | 99.74±0.52  | 90.48±13.13 |
|        | ER                            | 0.00±0.00   | 100.00±0.00 | 0.00±0.00   | 100.00±0.00 | -           |
|        | HEX                           | 70.00±40.00 | 30.00±40.00 | 0.00±0.00   | 100.00±0.00 | -           |
|        | HMTD                          | 75.60±30.11 | 24.40±30.11 | 9.05±3.61   | 90.95±3.61  | 65.06±17.78 |
|        | PER                           | 0.00±0.00   | 100.00±0.00 | 0.00±0.00   | 100.00±0.00 | -           |
|        | TATP                          | 48.86±14.55 | 51.14±14.55 | 15.95±6.05  | 84.05±6.05  | 43.17±5.44  |
| Ur     | 0.00±0.00                     | 100.00±0.00 | 0.26±0.53   | 99.74±0.53  | -           |             |
| Liquid | Ac                            | 10.00±20.00 | 90.00±20.00 | 1.15±2.31   | 98.85±2.31  | -           |
|        | BMK                           | 100.00±0.00 | 0.00±0.00   | 0.00±0.00   | 100.00±0.00 | 100.00±0.00 |
|        | Cy                            | 0.00±0.00   | 100.00±0.00 | 0.19±0.38   | 99.81±0.38  | -           |
|        | DP                            | 0.00±0.00   | 100.00±0.00 | 0.00±0.00   | 100.00±0.00 | -           |
|        | EG                            | 84.27±15.51 | 15.73±15.51 | 2.93±2.26   | 97.07±2.26  | 86.26±11.32 |
|        | Gly                           | 0.00±0.00   | 100.00±0.00 | 0.20±0.39   | 99.80±0.39  | -           |
|        | H <sub>2</sub> O <sub>2</sub> | 95.84±6.68  | 4.16±6.68   | 1.55±1.91   | 98.45±1.91  | 95.79±5.83  |
|        | H <sub>2</sub> O              | 80.00±40.00 | 20.00±40.00 | 0.00±0.00   | 100.00±0.00 | -           |
|        | MEK                           | 100.00±0.00 | 0.00±0.00   | 0.00±0.00   | 100.00±0.00 | 100.00±0.00 |
|        | MEKP                          | 82.38±10.61 | 17.62±10.61 | 0.80±0.75   | 99.20±0.75  | 84.80±10.30 |
| Ph     | 100.00±0.00                   | 0.00±0.00   | 0.00±0.00   | 100.00±0.00 | 100.00±0.00 |             |
| SA     | 26.67±8.58                    | 73.33±8.58  | 2.23±2.44   | 97.77±2.44  | 34.77±10.16 |             |
| To     | 6.67±13.33                    | 93.33±13.33 | 0.00±0.00   | 100.00±0.00 | -           |             |

Table S20. Classification results for the combined dataset consisting of all analytes obtained by using the RF classifier. The best classifier's results for solids and liquid analytes are shown separately.

|      | MA | HMTD | AA | TATP | PER | ER | EPH | COfb | DMNB | AN | Ur | HEX |
|------|----|------|----|------|-----|----|-----|------|------|----|----|-----|
| MA   | 0  | 0    | 0  | 0    | 0   | 0  | 0   | 0    | 0    | 0  | 0  | 0   |
| HMTD | 0  | 64   | 1  | 27   | 0   | 0  | 2   | 0    | 0    | 2  | 2  | 4   |
| AA   | 24 | 2    | 63 | 17   | 23  | 20 | 0   | 30   | 16   | 5  | 12 | 0   |
| TATP | 0  | 15   | 14 | 43   | 1   | 2  | 0   | 11   | 4    | 9  | 9  | 0   |
| PER  | 0  | 0    | 0  | 0    | 0   | 0  | 0   | 0    | 0    | 0  | 0  | 0   |
| ER   | 0  | 0    | 0  | 0    | 0   | 0  | 0   | 0    | 0    | 0  | 0  | 0   |
| EPH  | 0  | 0    | 0  | 0    | 0   | 0  | 18  | 0    | 0    | 0  | 0  | 1   |
| COfb | 0  | 0    | 5  | 0    | 0   | 0  | 0   | 9    | 0    | 0  | 1  | 0   |
| DMNB | 0  | 0    | 8  | 0    | 0   | 0  | 0   | 0    | 6    | 0  | 0  | 0   |
| AN   | 0  | 0    | 0  | 0    | 0   | 0  | 0   | 1    | 0    | 0  | 0  | 0   |
| Ur   | 0  | 0    | 1  | 0    | 0   | 0  | 0   | 0    | 0    | 0  | 0  | 0   |
| HEX  | 0  | 0    | 0  | 0    | 0   | 0  | 0   | 0    | 0    | 0  | 0  | 6   |

Table S21. Confusion matrix of solid analytes classification of the combined dataset with RF classifier.

| Analyte name     | TPR                           | FNR         | FPR         | TNR         | F1 SCORE    |             |
|------------------|-------------------------------|-------------|-------------|-------------|-------------|-------------|
| AN               | 0.00±0.00                     | 100.00±0.00 | 0.26±0.52   | 99.74±0.52  | -           |             |
| COfb             | 37.22±28.75                   | 62.78±28.75 | 2.25±1.69   | 97.75±1.69  | -           |             |
| DMNB             | 77.00±20.40                   | 23.00±20.40 | 2.13±3.64   | 97.87±3.64  | 74.48±16.41 |             |
| EPH              | 93.33±13.33                   | 6.67±13.33  | 0.00±0.00   | 100.00±0.00 | 96.00±8.00  |             |
| ER               | 0.00±0.00                     | 100.00±0.00 | 0.00±0.00   | 100.00±0.00 | -           |             |
| Solid            | HEX                           | 80.00±40.00 | 20.00±40.00 | 0.26±0.51   | 99.74±0.51  | -           |
| HMTD             | 70.66±22.50                   | 29.34±22.50 | 9.07±3.92   | 90.93±3.92  | 63.83±13.38 |             |
| MA               | 0.00±0.00                     | 100.00±0.00 | 1.32±2.04   | 98.68±2.04  | -           |             |
| PER              | 0.00±0.00                     | 100.00±0.00 | 0.26±0.53   | 99.74±0.53  | -           |             |
| TATP             | 47.14±10.90                   | 52.86±10.90 | 17.51±4.02  | 82.49±4.02  | 41.31±5.98  |             |
| Ur               | 0.00±0.00                     | 100.00±0.00 | 0.00±0.00   | 100.00±0.00 | -           |             |
| Ac               | 70.00±24.49                   | 30.00±24.49 | 4.01±5.92   | 95.99±5.92  | 53.89±31.99 |             |
| BMK              | 100.00±0.00                   | 0.00±0.00   | 0.00±0.00   | 100.00±0.00 | 100.00±0.00 |             |
| Cy               | 26.67±38.87                   | 73.33±38.87 | 0.58±0.77   | 99.42±0.77  | -           |             |
| DP               | 0.00±0.00                     | 100.00±0.00 | 0.00±0.00   | 100.00±0.00 | -           |             |
| EG               | 77.57±24.42                   | 22.43±24.42 | 3.66±2.18   | 96.34±2.18  | 79.74±15.98 |             |
| Gly              | 0.00±0.00                     | 100.00±0.00 | 0.19±0.38   | 99.81±0.38  | -           |             |
| Liquid           | H <sub>2</sub> O <sub>2</sub> | 86.87±16.07 | 13.13±16.07 | 1.03±1.51   | 98.97±1.51  | 90.80±10.31 |
| H <sub>2</sub> O | 90.00±20.00                   | 10.00±20.00 | 0.19±0.38   | 99.81±0.38  | 89.33±13.73 |             |
| MEK              | 100.00±0.00                   | 0.00±0.00   | 0.00±0.00   | 100.00±0.00 | 100.00±0.00 |             |
| MEKP             | 60.48±14.88                   | 39.52±14.88 | 3.63±3.42   | 96.37±3.42  | 58.51±11.88 |             |
| Ph               | 90.00±20.00                   | 10.00±20.00 | 0.00±0.00   | 100.00±0.00 | 93.33±13.33 |             |
| SA               | 14.44±8.81                    | 85.56±8.81  | 3.48±2.40   | 96.52±2.40  | -           |             |
| Tol              | 0.00±0.00                     | 100.00±0.00 | 0.19±0.39   | 99.81±0.39  | -           |             |

Table S22. Time series classification results for combined dataset obtained by using the CNN classifier. The best classifier's results for solids and liquid analytes are shown separately.



| Analyte                       | Varying dyes                                                                   |
|-------------------------------|--------------------------------------------------------------------------------|
| Ac                            | 4, 5, 8, 10, 13, 14, 15, 16, 17, 19, 20, 22, 25, 26                            |
| AN                            | 10, 13, 14, 16, 18, 20, 21                                                     |
| BMK                           | 4, 5, 8, 10, 13, 14, 15, 16, 17, 19, 20, 22, 24                                |
| COfb                          | 9, 13, 16, 18, 20, 21                                                          |
| Cy                            | 13, 14, 16, 18, 20                                                             |
| DMNB                          | 6, 13, 14, 16, 17, 18, 19, 20, 22, 25                                          |
| DP                            | 13, 14, 16, 18, 20, 21                                                         |
| EG                            | 4, 5, 6, 8, 10, 13, 14, 15, 16, 17, 18, 19, 20, 21, 22, 25, 26, 27             |
| EPH                           | 6, 7, 10, 13, 14, 15, 16, 17, 18, 19, 20, 21, 22, 27                           |
| ER                            | 13, 16                                                                         |
| Gly                           | 13, 14, 16, 18, 21                                                             |
| H <sub>2</sub> O              | 4, 5, 14, 15, 16, 17, 18, 19, 21, 22, 25                                       |
| H <sub>2</sub> O <sub>2</sub> | 4, 5, 8, 9, 10, 12, 13, 14, 15, 16, 17, 18, 19, 20, 21, 22, 23, 24, 25, 26, 27 |
| HEX                           | 5, 6, 8, 14, 15, 16, 17, 18, 19, 20, 21, 22, 27                                |
| HMTD                          | 4, 5, 10, 13, 14, 15, 16, 17, 18, 19, 20, 21, 22, 23, 26                       |
| MA                            | 13, 14, 16                                                                     |
| MEK                           | 4, 5, 7, 13, 16, 20, 25                                                        |
| MEKP                          | 2, 4, 5, 10, 11, 13, 14, 15, 16, 17, 18, 19, 20, 21, 22                        |
| PER                           | 13, 14, 16                                                                     |
| Ph                            | 9, 11, 13, 14, 16, 18, 20, 21, 23, 25, 26, 28                                  |
| SA                            | 13, 16, 18, 21                                                                 |
| TATP                          | 4, 5, 8, 13, 14, 15, 16, 17, 18, 19, 20, 21, 22, 23, 25, 26                    |
| To                            | 10, 16, 18, 20, 21                                                             |
| Ur                            | 14, 16, 20, 21                                                                 |

Table S23. List of dyes that vary when exposed to an analyte. A simple linear regression model is fitted to the data and the dyes for which we get a fit with  $R^2 \geq 0.8$  are shown.
